# Supplementary material for: A hollow core–shell MnO 2 -NT/NiMn-LDH/NiS electrode for enhanced supercapacitor performance
Source: Royal Society of Chemistry journal article supplement (doi:10.1039/d5nj02387d), 2025-01-01
Supplement: d5nj02387d1.pdf [file d5nj02387d1.pdf]

## Supporting Information

### Hollow core-shell MnO<sub>2</sub>-NT/NiMn-LDH/NiS electrode for enhanced supercapacitor performance

*Jiahong Zheng\*, Yuhan Wang, Jingyun Yang*

#### Materials

All chemicals were used as analytical-reagent grade without further purification: Manganese (II) Sulfate Monohydrate (MnSO<sub>4</sub>·H<sub>2</sub>O, ≥99%, Sinopharm Chemical Reagent Co., Ltd), Potassium Chlorate (KClO<sub>3</sub>, ≥98%, Tianjin Damao), Potassium Acetate (CH<sub>3</sub>COOK, ≥99%, Tianjin Damao), Tannic Acid (TA) (C<sub>76</sub>H<sub>52</sub>O<sub>46</sub>, AR, Tianjin Damao), Poly Dimethyl Diallyl Ammonium Chloride (PDDA) ((C<sub>8</sub>H<sub>16</sub>NCl)<sub>n</sub>, ≥20%, XILONG SCIENTIFIC), Hexamethylenetetramine (HMT, ≥99.5%, CHRON CHEMICALS), Nickel (II) Chloride Hexahydrate (NiCl<sub>2</sub>·6H<sub>2</sub>O, ≥99.9%, Tianjin Damao), Manganese (II) Chloride Tetrahydrate (MnCl<sub>2</sub>·4H<sub>2</sub>O, ≥99%, XILONG SCIENTIFIC) and Thioacetamide (TAA, ≥99%, Aladdin).

#### Characterization

To determine the crystal structure of the sample, we used an instrument called X-ray diffractometer (XRD, Bruker D8AA25). This instrument can infer the crystal structure of a sample by measuring its X-ray diffraction pattern. we used a scanning electron microscope (SEM, Hitachi S-4800, Japan) to observe the microstructure of the

---

Address correspondence to E-mail: jhzheng@chd.edu.cn (J.H. Zheng)

Tel: 86-029-82337340 Fax: 86-029-82337340

sample. Meanwhile, we also utilized transmission electron microscopy (TEM, Tecnai F30G2) to further analyze the internal morphology of the samples. we also used X-ray photoelectron spectroscopy (XPS, ESCALAB Xi+) to analyze the molecular structure, elemental valence states, and chemical bonding information of the samples. The porous nature, pore size distribution and surface area of the samples were examined by nitrogen adsorption-desorption isotherm (BET) and Barrett-Joyner-Halenda (BJH) approaches in an automated gas sorption analyzer (ASAP2020HD88).

### **Electrochemical measurements and necessary equations**

The electrochemical performance of the samples in both three-electrode and two-electrode systems were evaluated using an electrochemical workstation (CHI660E, Shanghai Chenhua). In three electrode system, Pt is the counter electrode and saturated calomel is used as the reference electrode. In addition, MnO<sub>2</sub>-NT/NiMn-LDH/NiS and activated carbon (AC) as positive and negative electrodes to assemble the ASC, respectively. Calculate specific capacitance (*C*), power density (*E*), and energy density (*P*) of electrode materials based on equations (1), (2), and (3), respectively.

$$C = \frac{I \times \Delta t}{M \times \Delta V} \quad (S1)$$

In the formula: *C* is the specific capacitance, unit: F·g<sup>-1</sup>; *I* is the discharge current, in A;  $\Delta t$  is the discharge time, in seconds; *M* is the mass of the active substance, in grams;  $\Delta V$  is the potential range of discharge, measured in V.

$$E = \frac{C \times \Delta V^2}{7.2} \quad (S2)$$

$$P = \frac{E \times 3600}{\Delta t} \quad (S3)$$

## Supplementary Figures

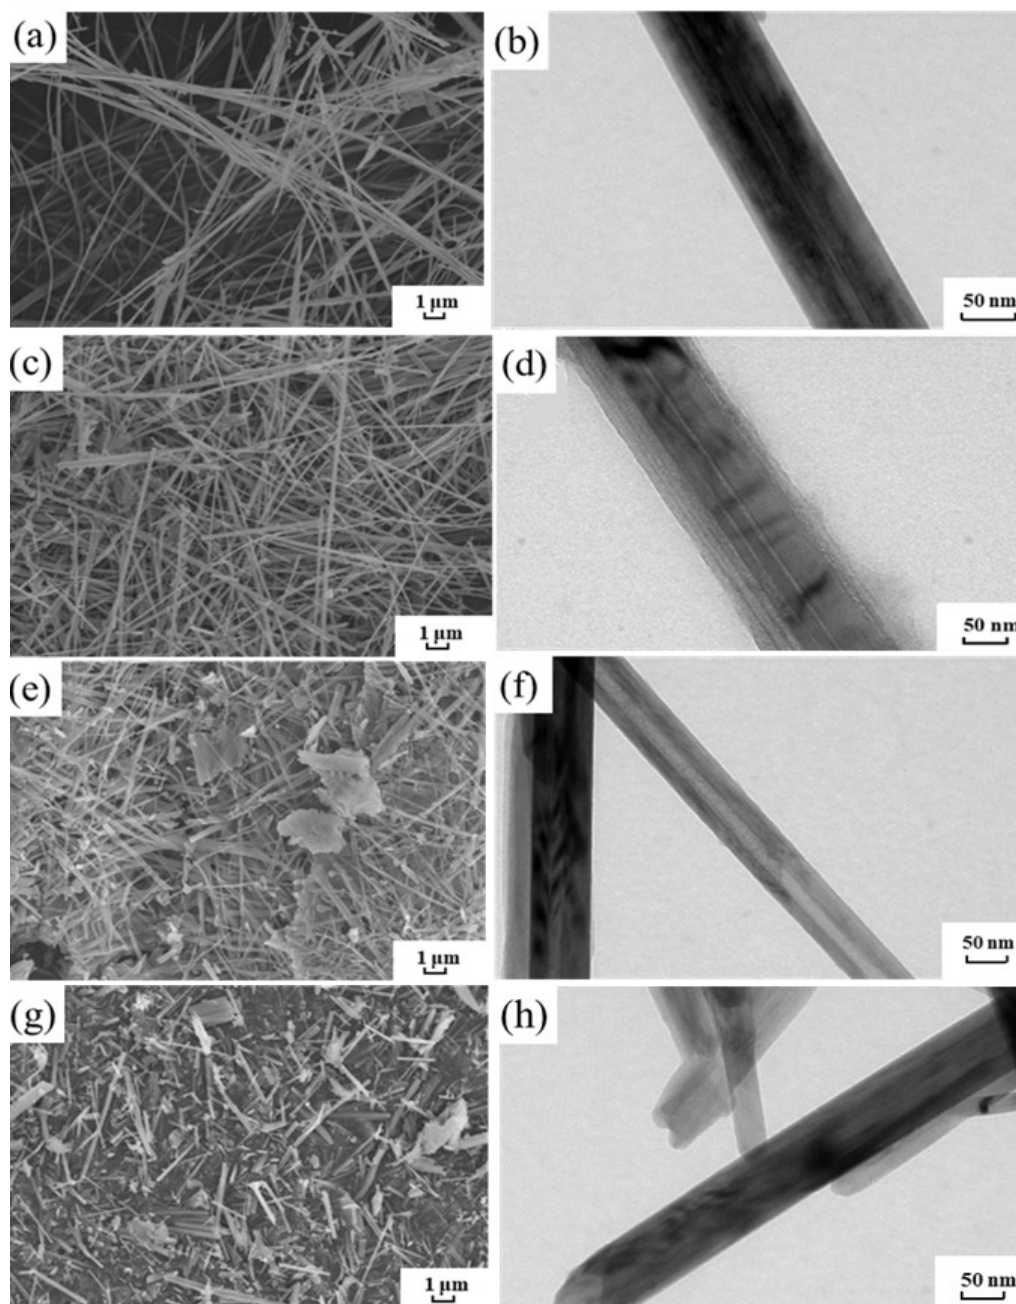

**Figure S 1.** SEM and TEM images of (a-b)  $0 \text{ mg} \cdot \text{mL}^{-1}$ , (c-d)  $1 \text{ mg} \cdot \text{mL}^{-1}$ , (e-f)  $5 \text{ mg} \cdot \text{mL}^{-1}$ , (g-h)  $10 \text{ mg} \cdot \text{mL}^{-1}$ .

SEM and TEM images of  $\text{MnO}_2$  at different TA concentrations with reaction temperature and reaction time of  $30^\circ\text{C}$  and 10 min. Fig. S1a and b† show the SEM and TEM images of  $\text{MnO}_2$  when TA concentration is 0, respectively. It can be seen from

the images that the morphology of  $\text{MnO}_2$  is nanowires with a length of about  $150\ \mu\text{m}$  and a diameter of about  $80\ \text{nm}$ , and the dispersion is good. When the concentration of TA increased to  $1\ \text{mg}\cdot\text{mL}^{-1}$ , the SEM and TEM images of  $\text{MnO}_2$  were shown in Fig. S1c and d†. The length and diameter of  $\text{MnO}_2$  barely changed, but a large number of holes appeared. When the concentration of TA was further increased to  $5\ \text{mg}\cdot\text{mL}^{-1}$  (Fig. S1e-f†), the morphology of  $\text{MnO}_2$  became nanotube, the length remained unchanged, the diameter decreased to about  $50\ \text{nm}$ , and the tube wall thickness was about  $20\ \text{nm}$ . When the concentration of TA was further increased to  $10\ \text{mg}\cdot\text{mL}^{-1}$ , the sample showed serious fracture and agglomeration, with a length of about  $5\text{-}20\ \mu\text{m}$ , as shown in Fig. S1g and h†. This may be due to the stricter etching of  $\text{MnO}_2$ -NW by too high concentration of tannic acid, resulting in fracture and gradual agglomeration during continuous stirring. Combined with the subsequent electrochemical performance analysis, the optimal concentration of TA was  $5\ \text{mg}\cdot\text{mL}^{-1}$ .

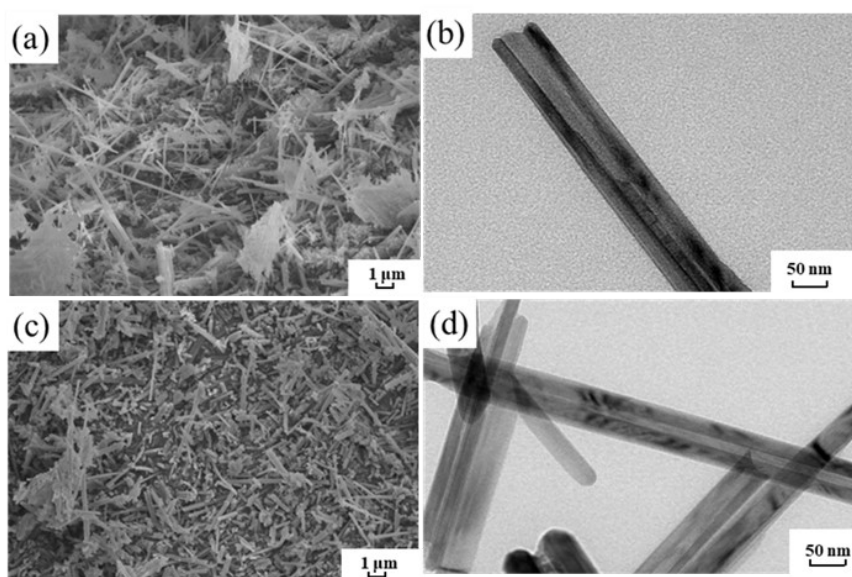

**Figure S 2.** SEM and TEM images of (a-b) 60 min, (c-d) 120 min.

When the concentration of TA was  $5\ \text{mg}\cdot\text{mL}^{-1}$ , the effect of etching time on the

morphology of  $\text{MnO}_2$  was further studied. When the etching time was increased to 60 min and 120 min, the SEM and TEM images of  $\text{MnO}_2$  were shown in Fig. S2†. Fig. S2a and b† are SEM and TEM images of  $\text{MnO}_2$  when the etching time is 60 min. When the reaction time was increased to 60 min, the sample size was almost unchanged, while the pore size of the nanotubes increased to 40 nm. It shows that with the extension of time, tannic acid will further etch  $\text{MnO}_2$ -NW. When the time was further extended to 120 min (S2c and d†), the pore size of the nanotubes did not change, and the sample showed a serious fracture phenomenon, and the length was reduced to about 10  $\mu\text{m}$ . Combined with subsequent electrochemical performance analysis, the optimal reaction

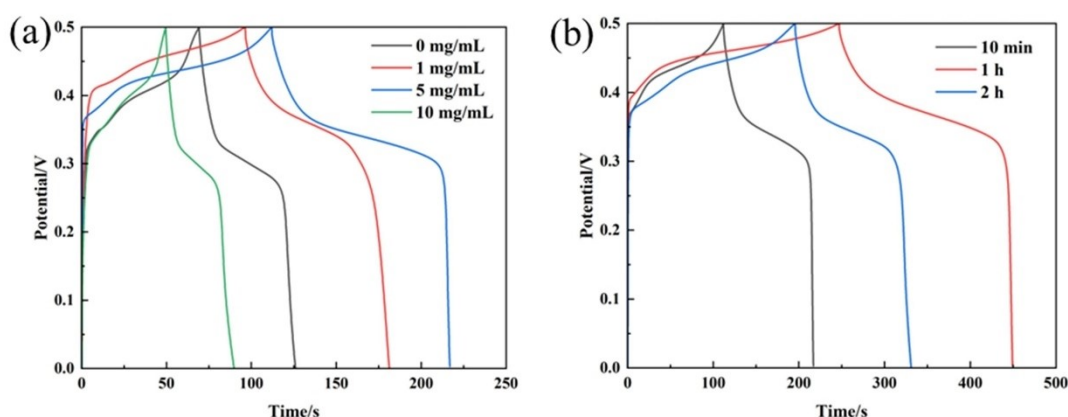

**Figure S 3.** GCD curves of the different samples at  $1 \text{ A} \cdot \text{g}^{-1}$ .

time was 60 min.

The effects of TA concentration and different reaction times on the electrochemical properties were investigated, and the results are shown in Fig. S4†. First, the reaction temperature and reaction time were selected to be  $30^\circ\text{C}$  and 10 min, respectively, and the GCD curves of the samples containing different TA additions at a current density of  $1 \text{ A} \cdot \text{g}^{-1}$  are shown in Fig. S4a†. The specific capacitance of the

samples increased and then decreased with the increase of TA concentration. When the TA concentration was  $5 \text{ mg} \cdot \text{mL}^{-1}$ , the samples had a maximum specific capacitance of  $209.6 \text{ F} \cdot \text{g}^{-1}$ . Fig. S4b† shows the GCD curves of the samples obtained at  $1 \text{ A} \cdot \text{g}^{-1}$  with different reaction times (10 min, 1 h, 2 h) under the conditions of TA concentration of  $5 \text{ mg} \cdot \text{mL}^{-1}$  and reaction temperature of  $30 \text{ }^{\circ}\text{C}$ , and the specific capacitances of the three groups of samples were calculated to be  $209.6 \text{ F} \cdot \text{g}^{-1}$ , respectively,  $404.0 \text{ F} \cdot \text{g}^{-1}$ , and  $270.5 \text{ F} \cdot \text{g}^{-1}$ , so the optimal reaction time was 1 h. Combined with the analysis of the above experimental results, the optimal experimental conditions were TA concentration of  $5 \text{ mg} \cdot \text{mL}^{-1}$  and reaction time of 1 h.

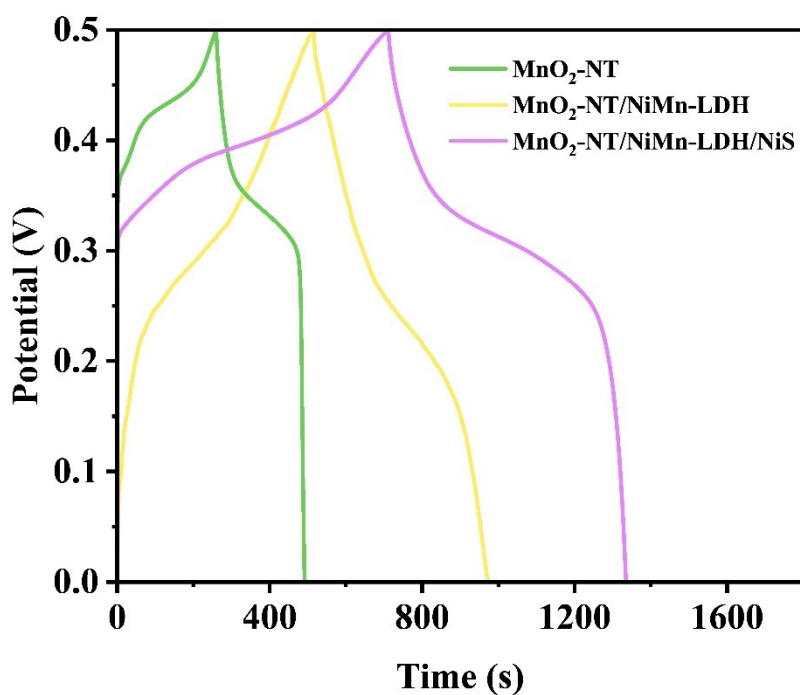

**Figure S 4.** Comparison of GCD curves of the different samples at  $1 \text{ A} \cdot \text{g}^{-1}$

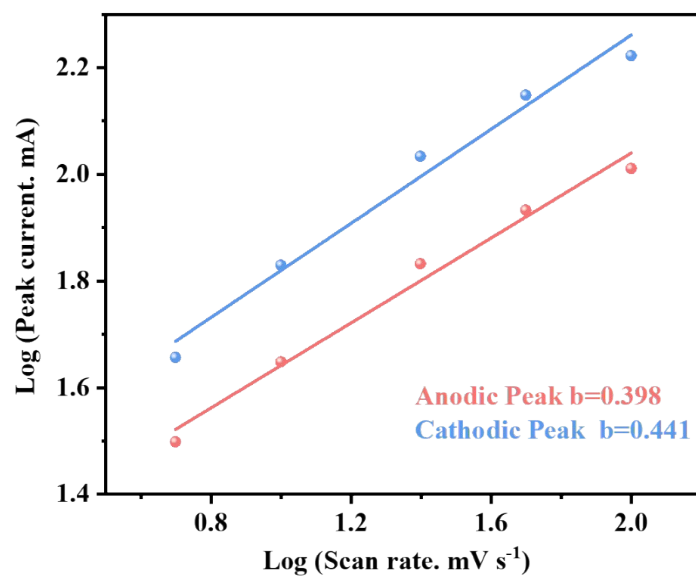

**Figure S 5.** Logarithmic diagram of peak current versus scan rate for  $\text{MnO}_2\text{-NT/NiMn-LDH/NiS}$ .

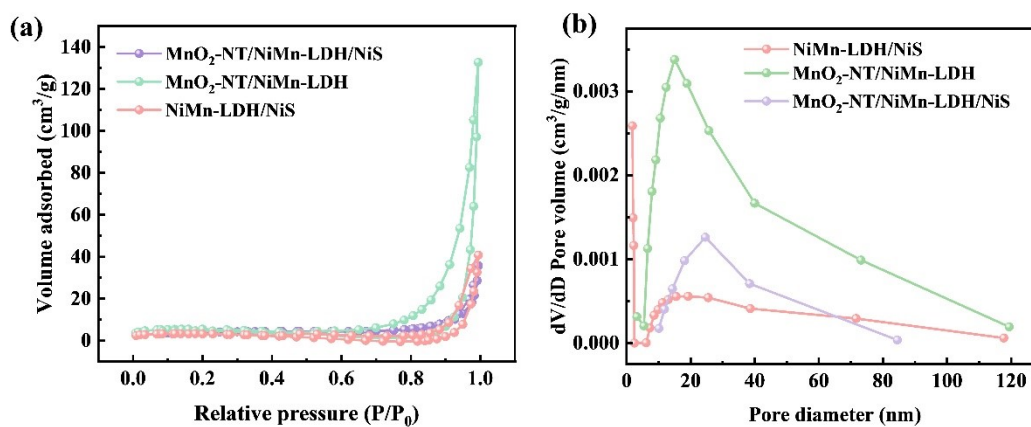

**Figure S6.** (a) Nitrogen adsorption/desorption isotherms and (b) pore size distributions of different samples.
